# Supplementary material for: Changes in Noninvasive Liver Fibrosis Indices and Spleen Size During Chemotherapy: Potential Markers for Oxaliplatin-Induced Sinusoidal Obstruction Syndrome
Source: PubMed Central journal article supplement (PMC4718264; doi:10.1097/md.0000000000002454), 2016-01-15

**Title: Changes in Non-invasive Liver Fibrosis Indices and Spleen Size During Chemotherapy: Potential Marker for Oxaliplatin-Induced Sinusoidal Obstruction Syndrome**

**Authors:** Sehhoon Park, MD, Hwi Young Kim, MD, PhD, Haeryoung Kim, MD, PhD, Jin Hyun Park, MD, Jung Ho Kim, MD, PhD, Ki Hwan Kim, MD, PhD, Won Kim, MD, PhD, In Sil Choi, MD, PhD, Yong Jin Jung, MD, PhD, Jin-Soo Kim, MD, PhD

**Supplementary Table 1. Correlation of non-invasive fibrosis indices and the characteristics of pathologic findings from the previous publication.**

|                                | Oxaliplatin-based<br>chemotherapy<br>(n=11, 47.8%) | No oxaliplatin-based<br>chemotherapy<br>(n=12, 52.2%) | <i>P</i>          |
|--------------------------------|----------------------------------------------------|-------------------------------------------------------|-------------------|
| SVI                            |                                                    |                                                       |                   |
| ≥ 0.3                          | 4 (36.4)                                           | 2 (16.7)                                              | .37 <sup>a</sup>  |
| < 0.3                          | 7 (63.6)                                           | 10 (83.3)                                             |                   |
| API change                     | 71.6 (-23.5-166.7)                                 | 23.6 (-26.8-73.9)                                     | .32 <sup>b</sup>  |
| APRI change                    | 0.45 (0.15-0.74)                                   | 0.23 (-0.5-0.51)                                      | .25 <sup>b</sup>  |
| PSR change                     | 1.44 (0.52-2.37)                                   | 2.83 (1.15-4.51)                                      | .14 <sup>b</sup>  |
| FIB-4 change                   | 1.43 (0.62-2.25)                                   | 0.78 (-0.23-1.79)                                     | .28 <sup>b</sup>  |
| Small vessel obliterans        | 9 (81.8)                                           | 5 (41.7)                                              | .09 <sup>a</sup>  |
| Focal hepatocyte injury        | 9 (81.8)                                           | 4 (33.3)                                              | .04 <sup>a</sup>  |
| Parenchymal extrinsic lesion   | 6 (54.6)                                           | 1 (8.3)                                               | .02 <sup>a</sup>  |
| NRH                            | 1 (9.1)                                            | 0 (0.0)                                               | .48 <sup>a</sup>  |
| Sinusoidal dilatation          |                                                    |                                                       |                   |
| Grade 0                        | 1 (9.1)                                            | 5 (41.7)                                              | .07 <sup>a</sup>  |
| Grade 1                        | 7 (63.6)                                           | 7 (58.3)                                              |                   |
| Grade 2                        | 3 (27.3)                                           | 0 (0.0)                                               |                   |
| Centrilobular vein fibrosis    | 8 (72.7)                                           | 6 (50.0)                                              | .25 <sup>a</sup>  |
| Macrovesicular steatosis       |                                                    |                                                       |                   |
| Grade 0                        | 5 (45.5)                                           | 6 (50.0)                                              | 1.00 <sup>a</sup> |
| Grade 1                        | 4 (36.4)                                           | 5 (41.7)                                              |                   |
| Grade 2                        | 2 (18.2)                                           | 1 (8.3)                                               |                   |
| Microvesicular steatosis       |                                                    |                                                       |                   |
| Grade 0                        | 6 (54.5)                                           | 7 (58.3)                                              | 1.00 <sup>a</sup> |
| Grade 1                        | 4 (36.4)                                           | 5 (41.7)                                              |                   |
| Grade 2                        | 1 (9.1)                                            | 0 (0.0)                                               |                   |
| Hepatocyte ballooning          | 3 (27.3)                                           | 3 (25.0)                                              | 1.00 <sup>a</sup> |
| Fibrosis                       |                                                    |                                                       |                   |
| Periportal                     | 1 (9.1)                                            | 4 (33.3)                                              | .72 <sup>a</sup>  |
| Portal                         | 4 (36.4)                                           | 3 (25.0)                                              |                   |
| Bridging                       | 5 (45.4)                                           | 4 (33.3)                                              |                   |
| Cirrhosis                      | 1 (9.1)                                            | 1 (8.3)                                               |                   |
| Cholestasis                    | 3 (27.3)                                           | 1 (8.3)                                               | .32 <sup>a</sup>  |
| Portal lymphocyte infiltration |                                                    |                                                       |                   |
| Grade 0                        | 4 (36.4)                                           | 5 (41.7)                                              | 1.00 <sup>a</sup> |

|                 |          |          |                  |
|-----------------|----------|----------|------------------|
| Grade 1         | 6 (54.6) | 6 (50.0) |                  |
| Grade 2         | 1 (9.1)  | 0 (0.0)  |                  |
| Grade 3         | 0 (0.0)  | 1 (8.3)  |                  |
| Ductal reaction | 7 (63.7) | 2 (16.7) | .04 <sup>a</sup> |

---

Oxaliplatin-based regimen: FOLFOX, XELOX

No oxaliplatin-based regimen: Capecitabine single, 5-FU and leucovorin, FOLFIRI, UFTE, UFTE and leucovorin

<sup>a</sup> *P* calculated by Fisher's exact test

<sup>b</sup> *P* calculated by Student's t-test

Abbreviations: NRH = nodular regeneration hyperplasia, FOLFOX = oxaliplatin, fluorouracil and leucovorin, XELOX = capecitabine and oxaliplatin, FOFIRI = irinotecan, fluorouracil and leucovorin

**Supplementary Table 2. Sequential changes of non-invasive liver fibrosis indices in the 70 patients treated with 12 cycles of FOLFOX**

| Mean<br>(95% CI) | SVI $\geq$ 0.3<br>(n=32)        | SVI $<$ 0.3<br>(n=38)        | <i>P</i>         | SVI $\geq$ 0.3<br>(n=32)         | SVI $<$ 0.3<br>(n=38)        | <i>P</i>         |
|------------------|---------------------------------|------------------------------|------------------|----------------------------------|------------------------------|------------------|
|                  | 3 <sup>rd</sup> cycle of FOLFOX |                              |                  | 6 <sup>th</sup> cycle of FOLFOX  |                              |                  |
| SVI              | 0.17<br>(0.06-0.29)             | -0.94<br>(-0.16 to<br>-0.03) | $<.01^a$         | 0.33<br>(0.21-0.44)              | -0.03<br>(-0.12- 0.06)       | $<.01^a$         |
| API<br>changes   | 1.97<br>(1.29-2.64)             | 1.16<br>(0.48-1.84)          | .09 <sup>a</sup> | 3.03<br>(2.49-3.58)              | 1.92<br>(1.33-2.51)          | .01 <sup>a</sup> |
| APRI<br>changes  | 0.17<br>(0.01-0.32)             | 0.07<br>(-0.03 to<br>0.16)   | .11 <sup>b</sup> | 0.37<br>(0.16-0.58)              | 0.27<br>(0.13-0.41)          | .23 <sup>b</sup> |
| PSR<br>changes   | 1.49<br>(0.83-2.75)             | 2.55<br>(1.65-3.46)          | .24 <sup>a</sup> | -1.80<br>(-2.32 to<br>-1.29)     | -1.39<br>(-1.97 to<br>-0.81) | .29 <sup>a</sup> |
| FIB-4<br>changes | 0.87<br>(0.46-1.29)             | 0.56<br>(0.14-0.98)          | .29 <sup>a</sup> | 1.74<br>(1.22-2.26)              | 1.29<br>(0.81-1.78)          | .21 <sup>a</sup> |
|                  | 9 <sup>th</sup> cycle of FOLFOX |                              |                  | 12 <sup>th</sup> cycle of FOLFOX |                              |                  |
| SVI              | 0.47<br>(0.36-0.58)             | 0.07<br>(-0.04 to<br>0.19)   | $<.01^a$         | 0.73<br>(-0.62-0.83)             | 0.01<br>(-0.06 to 0.08)      | $<.01^a$         |
| API<br>changes   | 3.53<br>(3.03-4.03)             | 2.50<br>(1.89-3.11)          | .01 <sup>a</sup> | 3.31<br>(2.70-3.92)              | 2.37<br>(1.80-2.93)          | .02 <sup>a</sup> |
| APRI<br>changes  | 0.44<br>(0.29-0.60)             | 0.31<br>(0.19-0.43)          | .12 <sup>b</sup> | 0.43<br>(0.26-0.60)              | 0.30<br>(0.16-0.43)          | .05 <sup>b</sup> |
| PSR<br>changes   | 0.07<br>(-0.62 to<br>0.75)      | 0.89<br>(0.07-1.70)          | .13 <sup>a</sup> | -0.04<br>(-0.69 to 0.61)         | 1.16<br>(0.53-1.78)          | .01 <sup>a</sup> |
| FIB-4<br>changes | 2.10<br>(1.63-2.56)             | 1.45<br>(1.00-1.90)          | .05 <sup>a</sup> | 2.11<br>(1.63-2.60)              | 1.42<br>(1.04-1.80)          | .03 <sup>a</sup> |

Patient was categorized into two groups, SVI  $\geq$  0.3 and SVI  $<$  0.3 which were calculated at the end of chemotherapy. Changes were calculated by subtracting value at beginning of chemotherapy from value at each cycle. <sup>a</sup> *P* calculated by Student's t-test; <sup>b</sup> *P* calculated by Wilcoxon rank-sum test

Abbreviations: SVI = splenic volume index, SV = splenic volume, API = age-platelet index, APRI = AST to platelet ratio index, PSR = platelet to spleen ratio, FIB-4 = fibrosis-4 score, FOLFOX = oxaliplatin, fluorouracil and leucovorin



**Supplementary Table 3. Pathologic characteristics of 4 patients who underwent hepatectomy after treated with oxaliplatin based chemotherapy in Boramae Medical Center**

|                                                  | Patient 1          | Patient 2      | Patient 3      | Patient 4      |
|--------------------------------------------------|--------------------|----------------|----------------|----------------|
| SVI                                              | 0.62               | 0.22           | 0.02           | 1.25           |
| Age                                              | 50                 | 70             | 72             | 66             |
| Sex                                              | Male               | Male           | Male           | Male           |
| Type of cancer                                   | Colon cancer       | Colon cancer   | Colon cancer   | Gastric Cancer |
| Initial stage                                    | 4                  | 4              | 4              | 4              |
| Cumulative oxaliplatin dose (mg/m <sup>2</sup> ) | 255                | 510            | 765            | 1040           |
| API change                                       | 1                  | 3              | 4              | 5              |
| APRI change                                      | 0.378              | 0.277          | 0.847          | 0.523          |
| PSR change                                       | -0.570             | 2.220          | -0.270         | -0.892         |
| FIB-4 change                                     | 1.469              | 0.724          | 2.325          | 3.798          |
| Sinusoidal dilatation                            | Grade 2 (moderate) | Grade 1 (mild) | Grade 1 (mild) | Grade 1 (mild) |
| Centrilobular vein fibrosis                      | Present            | Present        | NA             | Absent         |
| Small vessel obliteration                        | Present            | Absent         | NA             | Absent         |
| Hepatocyte plate disruption                      | Present            | Present        | Present        | Present        |
| Parenchymal extinction lesion                    | Present            | Present        | NA             | Present        |

**Medical history of patient 4.** A 66 year-old male patient presented with advanced gastric adenocarcinoma with a metastatic lesion in the left lobe of liver. He had no history of chronic liver disease and showed no sign of portal hypertension at initial evaluation. Pretreatment Child- Pugh Score was 5, and non-invasive liver fibrosis indices were as follows: API was 4; APRI was 0.124; PSR was 5.200; FIB-4 was 0.942. A total of 8 cycles of XELOX (oxaliplatin – 130mg/m<sup>2</sup> at day 1 and capecitabine – 1000mg/m<sup>2</sup> at day 1 to day 14) were given every 3 weeks. Best objective response was a partial response by RECIST 1.1. After the chemotherapy, Child-Pugh Score was 6, and non-invasive liver fibrosis indices were as follows: API was 9; APRI was 0.647; PSR was 4.308; FIB-4 was 4.740. Splenic volume index was 1.25. Subtotal gastrectomy with left lateral liver sectionectomy was performed at 5<sup>th</sup> week after the last dose of chemotherapy. At 2 months after the surgery, the patient complained of abdominal distension. CT scans and endoscopic examination revealed ascites and grade I esophageal varix with Child-Pugh Score of 8 (Child-Pugh class B)

Abbreviations: SVI = splenic volume index, SV = splenic volume, API = age-platelet index, APRI = AST to platelet ratio index, PSR = platelet to spleen ratio, FIB-4 = fibrosis-4 score

### Supplementary Fig 1. Distribution of changes of (A) SVI, (B) API, (C) APRI, (D) PSR, and (E) FIB-4

Changes of each index were calculated by subtracting the index value after the chemotherapy from the index value before the chemotherapy. All actual values were plotted.

Abbreviations: SVI = splenic volume index, SV = splenic volume, API = age-platelet index, APRI = AST-to-platelet ratio index, PSR = platelet-to-spleen ratio, FIB-4 = Fibrosis-4 score

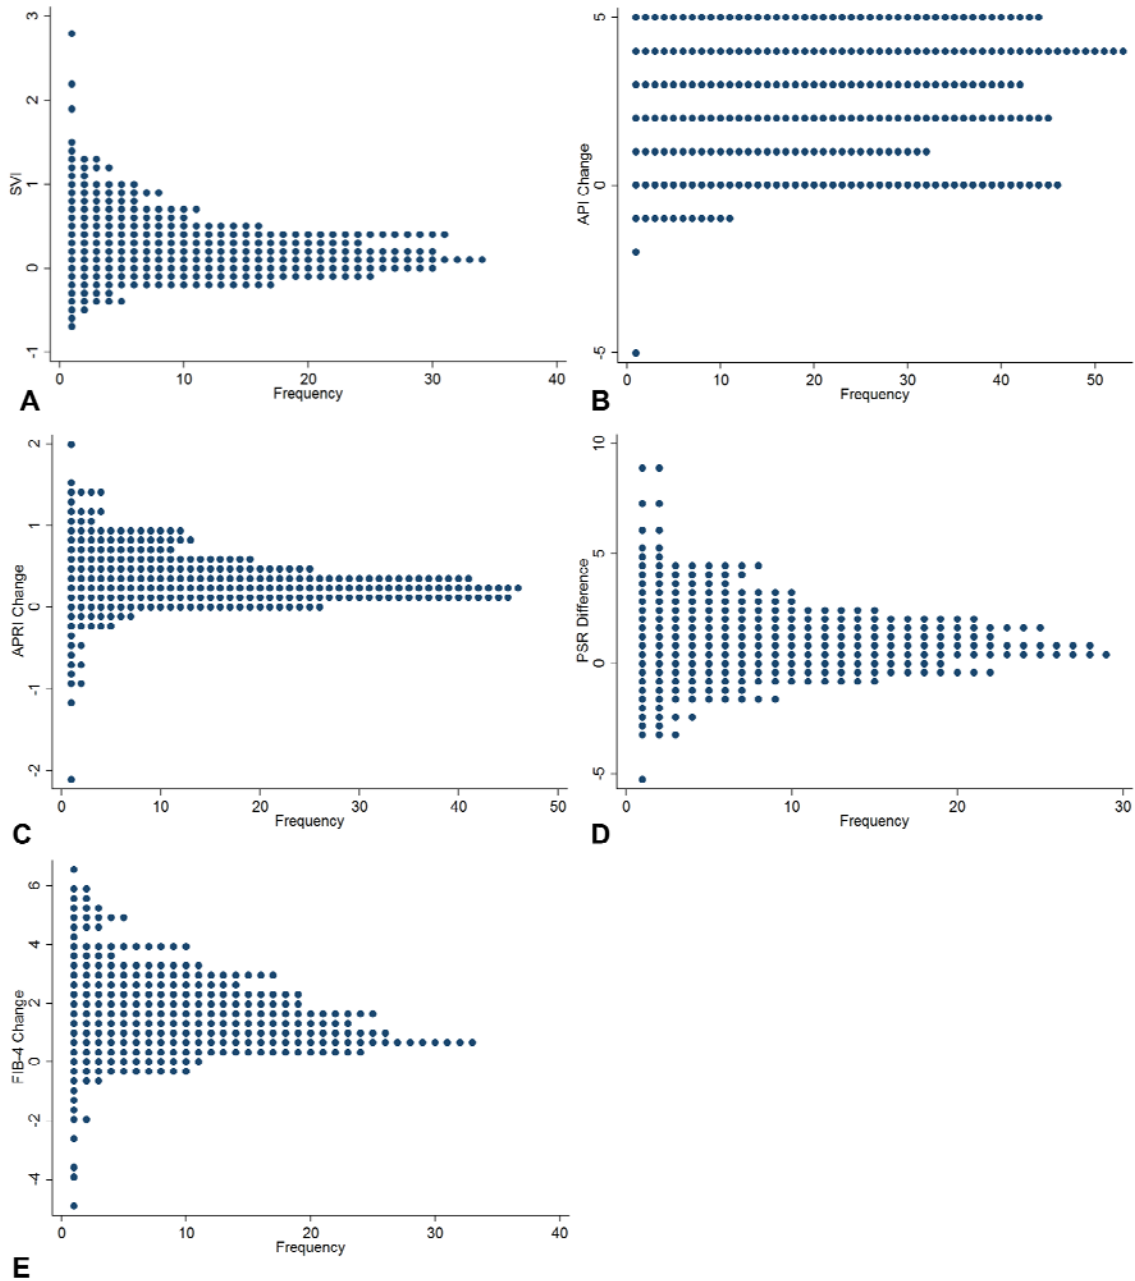

**Supplementary Fig. 2. Photomicrographs of the histopathologic finding of patient 1 in Supplementary Table 3.**

(A) Centrilobular fibrosis and small vessel obliterans (X200), (B) Sinusoidal dilatation and hepatocyte plate disruption (X100), (C, D) Sinusoidal dilatation and parenchymal extinction lesion (X50)

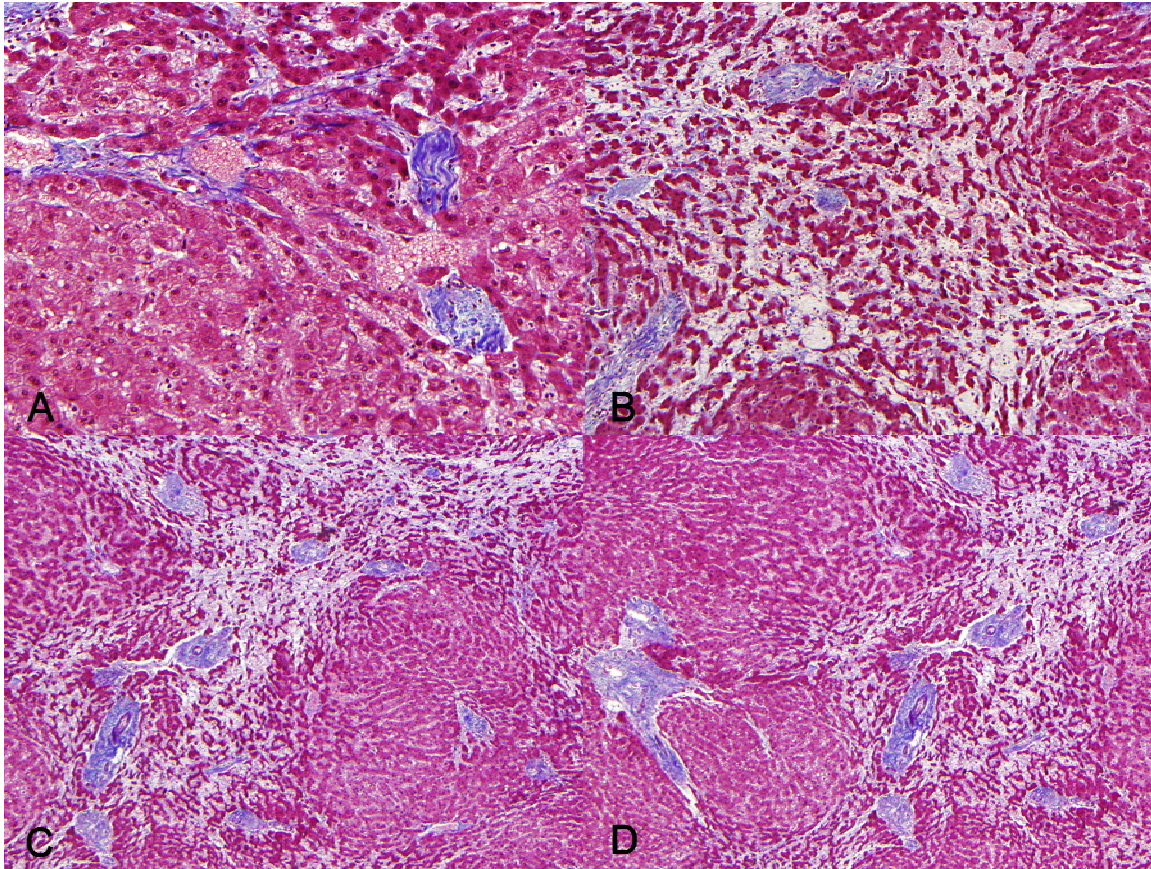

**Supplementary Fig. 3. CT scans and endoscopic picture of esophageal varix of patient 4 in Supplementary Table 3.**

(A) Pretreatment CT scans show advanced gastric cancer with a 1.2 cm-sized metastatic lesion in liver, (B) After 8 cycles of XELOX chemotherapy, CT images show a partial response with decreased liver metastasis and gastric lesion. Note that the spleen size increased compared to the one shown in Figure A. (C) 2 months after subtotal gastrectomy with the left lateral liver sectionectomy, the CT scan shows a moderate amount of ascites with a diffuse edematous wall thickening of the bowel walls. (D) Endoscopic picture at 2 months after surgery shows linear mild venous distensions with grade 1 esophageal varix in the distal esophagus.

Abbreviations: XELOX = oxaliplatin and capecitabine; CT = computed tomography

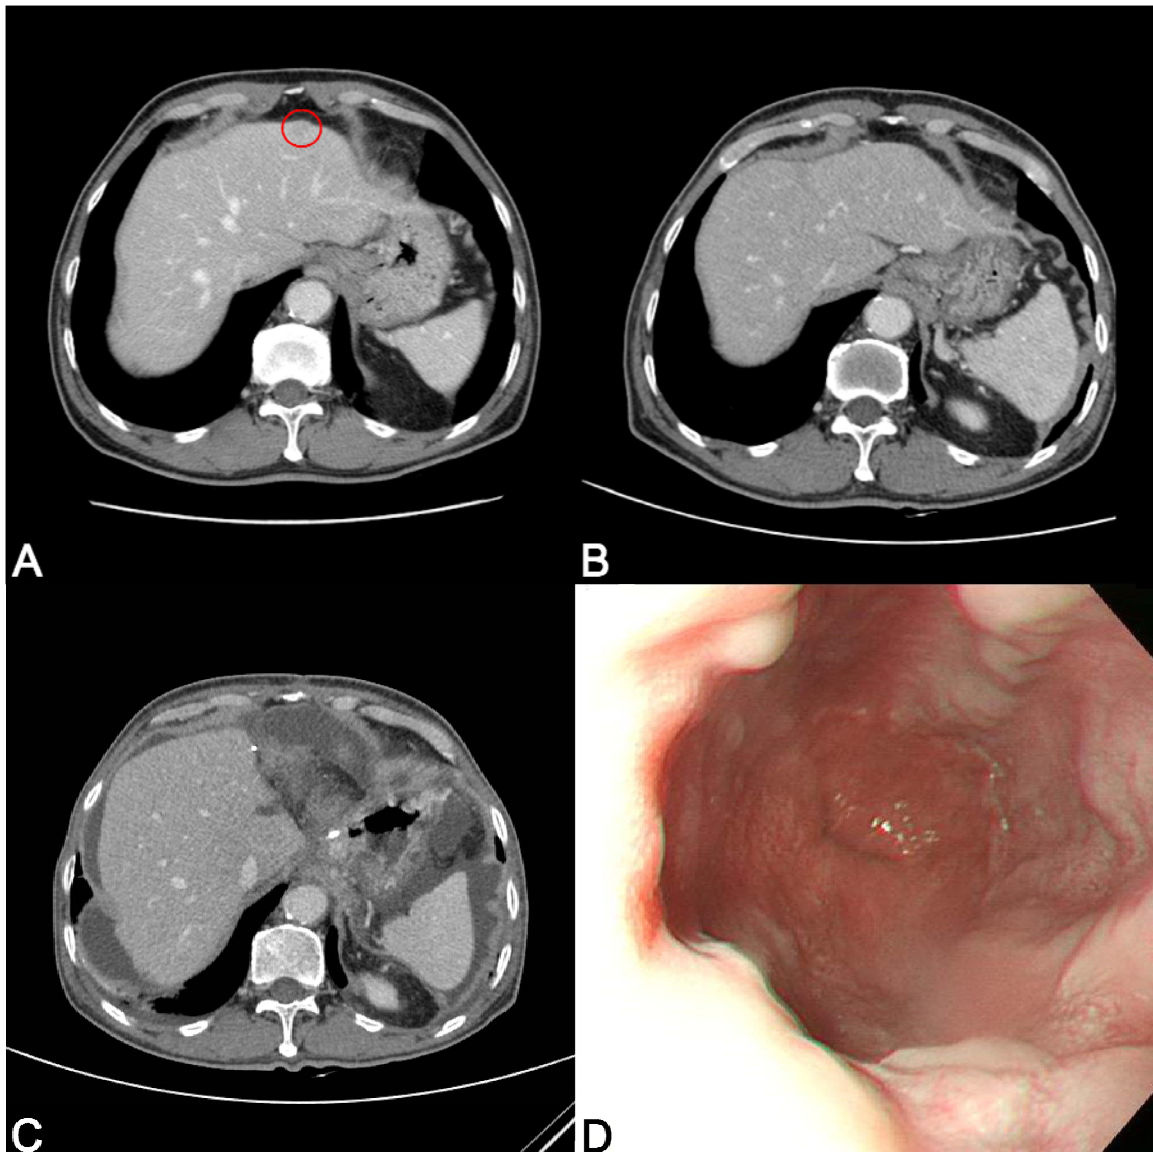

Supplement: medi-95-e2454-s001.pdf [file medi-95-e2454-s001.pdf]
